# Supplementary material
Source: HighWire-hosted journal article supplement (https://erj.ersjournals.com/content/61/1/2200592)

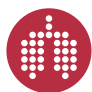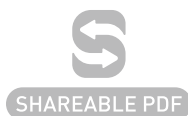

# Transcriptomic clustering of critically ill COVID-19 patients

Cecilia López-Martínez<sup>1,2,3</sup>, Paula Martín-Vicente<sup>1,2,3</sup>, Juan Gómez de Oña<sup>1,4,5</sup>, Inés López-Alonso<sup>1,2,3,6</sup>, Helena Gil-Peña<sup>1,7</sup>, Elías Cuesta-Llavona<sup>1,4</sup>, Margarita Fernández-Rodríguez<sup>1,3</sup>, Irene Crespo<sup>1,2,8</sup>, Estefanía Salgado del Riego<sup>1,9</sup>, Raquel Rodríguez-García<sup>1,2,10</sup>, Diego Parra<sup>1,10</sup>, Javier Fernández<sup>1,11</sup>, Javier Rodríguez-Carrio<sup>1,8</sup>, Francisco José Jimeno-Demuth<sup>12</sup>, Alberto Dávalos<sup>13</sup>, Luis A. Chapado<sup>13</sup>, Eliecer Coto<sup>1,4,5,14</sup>, Guillermo M. Albaiceta<sup>1,2,3,8,10,15</sup> and Laura Amado-Rodríguez<sup>1,2,3,10,14,15</sup>

<sup>1</sup>Instituto de Investigación Sanitaria del Principado de Asturias, Oviedo, Spain. <sup>2</sup>Centro de Investigación Biomédica en Red (CIBER)-Enfermedades Respiratorias, Madrid, Spain. <sup>3</sup>Instituto Universitario de Oncología del Principado de Asturias, Oviedo, Spain. <sup>4</sup>Servicio de Genética Molecular, Hospital Universitario Central de Asturias, Oviedo, Spain. <sup>5</sup>Red de Investigación Renal (REDINREN), Madrid, Spain. <sup>6</sup>Departamento de Morfología y Biología Celular, Universidad de Oviedo, Oviedo, Spain. <sup>7</sup>Servicio de Pediatría, Hospital Universitario Central de Asturias, Oviedo, Spain. <sup>8</sup>Departamento de Biología Funcional, Universidad de Oviedo, Oviedo, Spain. <sup>9</sup>Unidad de Cuidados Intensivos Polivalente, Hospital Universitario Central de Asturias, Oviedo, Spain. <sup>10</sup>Unidad de Cuidados Intensivos Cardiológicos, Hospital Universitario Central de Asturias, Oviedo, Spain. <sup>11</sup>Servicio de Microbiología, Hospital Universitario Central de Asturias, Oviedo, Spain. <sup>12</sup>Servicio de Informática, Hospital Universitario Central de Asturias, Oviedo, Spain. <sup>13</sup>Instituto Madrileño de Estudios Avanzados (IMDEA) Alimentación, CEI UAM+CSIC, Madrid, Spain. <sup>14</sup>Departamento de Medicina, Universidad de Oviedo, Oviedo, Spain. <sup>15</sup>G.M. Albaiceta and L. Amado-Rodríguez share last authorship.

Corresponding author: Guillermo M. Albaiceta ([gma@crit-lab.org](mailto:gma@crit-lab.org))

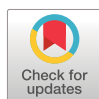

Shareable abstract (@ERSpublications)

Gene expression in peripheral blood determines two clusters of critically ill COVID-19 patients with different pathogenesis and outcomes <https://bit.ly/3QLEld7>

**Cite this article as:** López-Martínez C, Martín-Vicente P, Gómez de Oña J, et al. Transcriptomic clustering of critically ill COVID-19 patients. *Eur Respir J* 2023; 61: 2200592 [DOI: 10.1183/13993003.00592-2022].

This single-page version can be shared freely online.

Copyright ©The authors 2023.

This version is distributed under the terms of the Creative Commons Attribution Non-Commercial Licence 4.0. For commercial reproduction rights and permissions contact [permissions@ersnet.org](mailto:permissions@ersnet.org)

This article has an editorial commentary:  
<https://doi.org/10.1183/13993003.02008-2022>

Received: 20 March 2022  
Accepted: 19 Aug 2022

## Abstract

**Background** Infections caused by severe acute respiratory syndrome coronavirus 2 (SARS-CoV-2) may cause a severe disease, termed coronavirus disease 2019 (COVID-19), with significant mortality. Host responses to this infection, mainly in terms of systemic inflammation, have emerged as key pathogenetic mechanisms and their modulation has shown a mortality benefit.

**Methods** In a cohort of 56 critically ill COVID-19 patients, peripheral blood transcriptomes were obtained at admission to an intensive care unit (ICU) and clustered using an unsupervised algorithm. Differences in gene expression, circulating microRNAs (c-miRNAs) and clinical data between clusters were assessed, and circulating cell populations estimated from sequencing data. A transcriptomic signature was defined and applied to an external cohort to validate the findings.

**Results** We identified two transcriptomic clusters characterised by expression of either interferon-related or immune checkpoint genes, respectively. Steroids have cluster-specific effects, decreasing lymphocyte activation in the former but promoting B-cell activation in the latter. These profiles have different ICU outcomes, despite no major clinical differences at ICU admission. A transcriptomic signature was used to identify these clusters in two external validation cohorts (with 50 and 60 patients), yielding similar results.

**Conclusions** These results reveal different underlying pathogenetic mechanisms and illustrate the potential of transcriptomics to identify patient endotypes in severe COVID-19 with the aim to ultimately personalise their therapies.

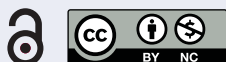

Supplement: inline-supplementary-material-3 [file inline-supplementary-material-3.pdf]
